# Supplementary material for: NMR metabolomic and microarray-based transcriptomic data integration identifies unique molecular signatures of hypersensitivity pneumonitis
Source: Royal Society of Chemistry journal article supplement (doi:10.1039/d1mo00209k), 2021-12-09
Supplement: d1mo00209k1.pdf [file d1mo00209k1.pdf]

## NMR metabolome and microarray-based transcriptome data integration identifies unique molecular signatures of hypersensitivity pneumonitis

### NMR measurements

**Serum:** 200  $\mu\text{L}$  of serum and 400  $\mu\text{L}$  of saline solution (prepared from 0.9% NaCl, 15%  $\text{D}_2\text{O}$  and 3 mM trimethylsilyl propanoic acid (TSP) were mixed together. Following centrifugation at  $1500\times g$  for 10 min, an aliquot of 600  $\mu\text{L}$  of each sample supernatant was transferred into 5 mm NMR tubes.

**EBC:** 70  $\mu\text{L}$   $\text{D}_2\text{O}$  solution, containing 1mM TSP and 3 mM sodium azide, was added to 630  $\mu\text{L}$  of EBC. 600  $\mu\text{L}$  of the sample was transferred into 5 mm NMR tubes.

**BALF:** 400  $\mu\text{L}$   $\text{D}_2\text{O}$  with 0.1 mM TSP was mixed with 200  $\mu\text{L}$  of BALF. 600  $\mu\text{L}$  of the sample was used for NMR experiments.

Carr–Purcell–Meiboom–Gill (CPMG) spin-echo spectra of serum samples were recorded with spectral width of 14 000 Hz, 256 transients, 4.0 s relaxation delay, 32 k data points each and an acquisition time of 0.58 s. For EBC samples, the carrier frequency (O1) value was set on the water resonance, 4 s relaxation delay, 0.82 s acquisition time, 10000 Hz spectral width, 16K time domain was and 160 number of transients. For processing, a shifted sine bell (SSB) of 2 Hz was applied prior to Fourier transformation (FT) and a real spectrum size of 16 K was used. For BALF samples, one-dimensional spectra were recorded using the excitation sculpting pulse sequence for suppression of water signal. The relaxation delay was 4 sec and 160 number of scans were recorded for each sample.

0.3 Hz line broadening was applied prior to Fourier transformation to all the free induction decays (FIDs). All spectra were manually phased and baseline corrected, and referenced to TSP ( $\delta = 0.0$  ppm) using MestReNova version 12.0.2 (Mestrelab Research, Santiago de Compostela, Spain). Normalization of the spectrum to its total area was performed using the same tool to limit the effect of concentration differences between samples. Due to poor signal to noise ratio in the aromatic region, univariate analysis was carried out in this region. Human Metabolome Database (HMDB 3.6) was used to identify each metabolite in the spectra. Furthermore, TOCSY (total correlation spectroscopy) along with previously published literature, was used to validate the assignment of peaks. While performing the metabolomics experiments, metabolomics standards initiative (MSI) guidelines were followed. Quality control (QC) samples were run throughout to examine the analytical variance. Equivalent volumes of each biofluid

(50  $\mu$ L) were aliquoted from all subjects and respectively pooled together to prepare the QC samples. Coefficient of variation (CVs) for each of the identified and quantified metabolites were calculated based on the QC samples (~ 40) and was found to be <15%.

### **Spectral pre-processing**

Using MestReNova, spectra was binned into equal frequency windows of 0.003 ppm, thereby resulting in 5200 integrated segments <sup>1</sup>. Multivariate analysis was performed to the spectral region of 0–5.5 ppm for serum and BALF and to 0-5 ppm region for EBC. Normalization (by sum) and unit variance scaling were performed on the working region of the binned data matrix using Metaboanalyst 4.0 <sup>2</sup>. Following preprocessing and missing value imputation, the data was subjected to multivariate analysis using SIMCA 13.0.2 (Umetrics, Sweden).

### **References**

1. A. Hajduk, J. Mrochem-Kwarciak, A. Skorupa, M. Ciszek, A. Heyda, K. Składowski and M. Sokół, *Metabolomics*, 2016, **12**, 102.
2. J. Chong, O. Soufan, C. Li, I. Caraus, S. Li, G. Bourque, DS. Wishart, J. Xia, *Nucleic Acids Res.*, 2018, **46**, W486-94.

A

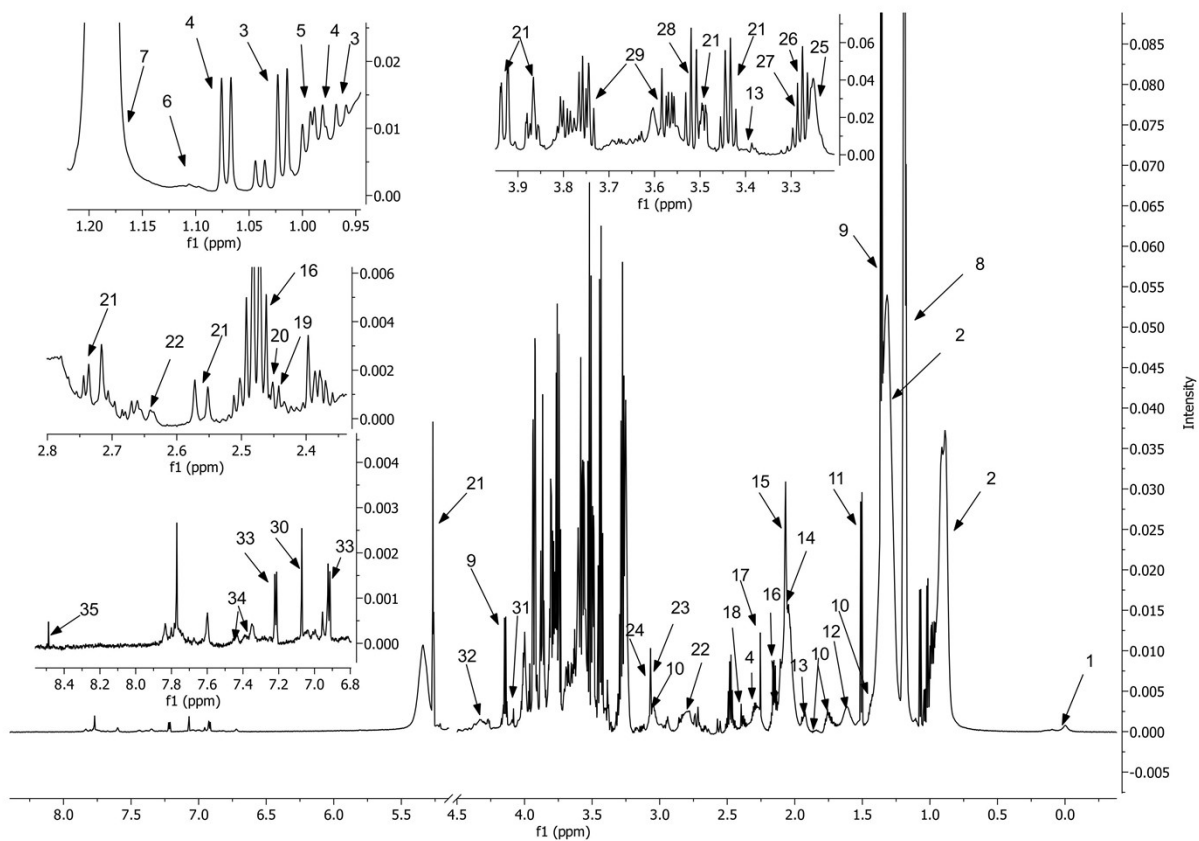

B

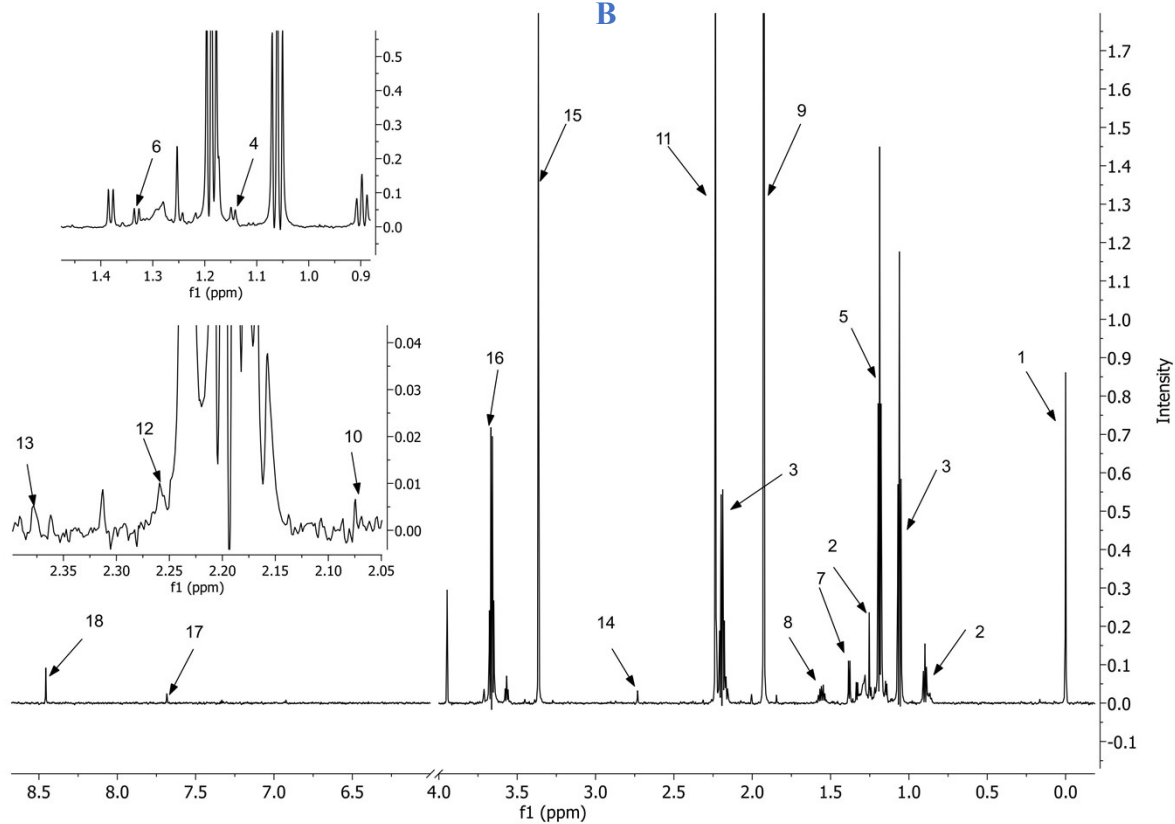

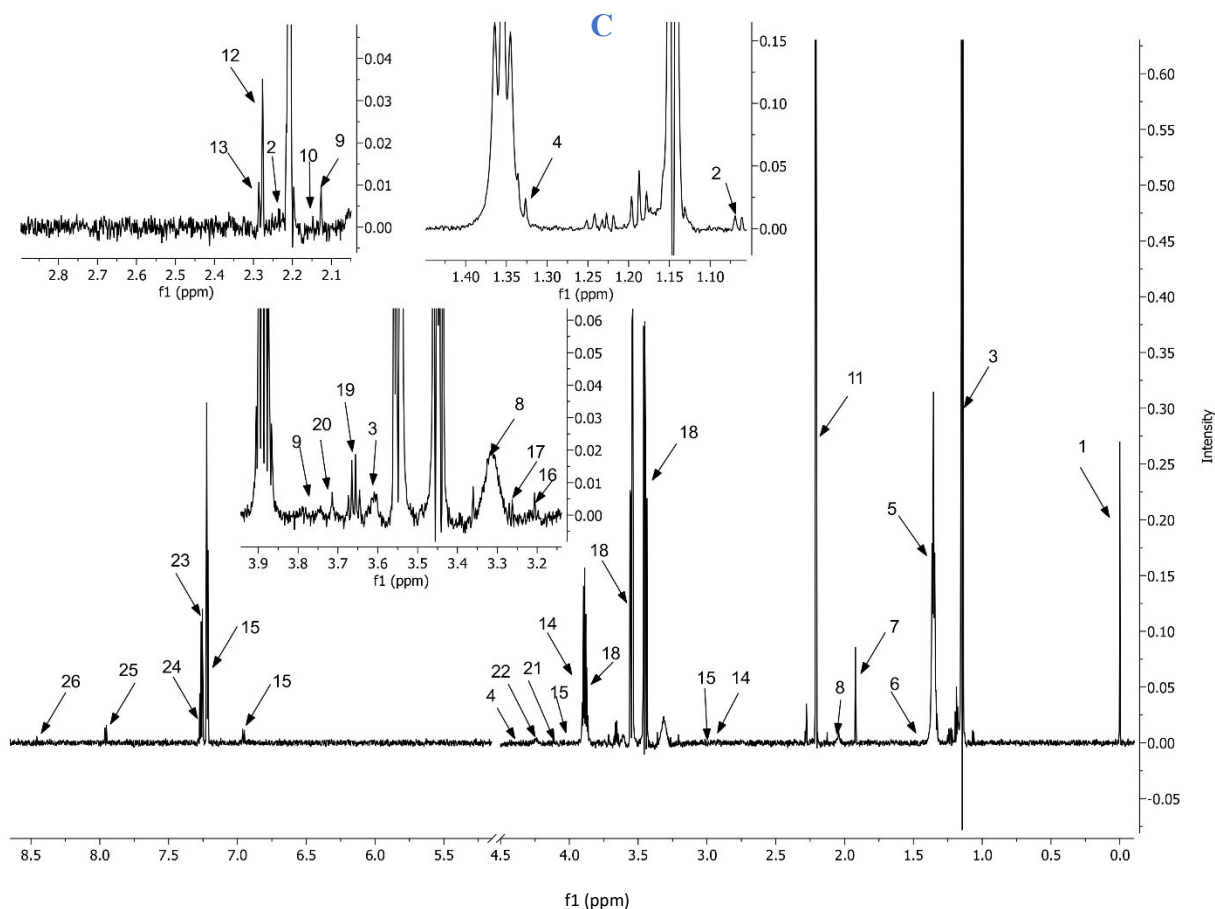

**Fig. S1** Representative spectra of human (A) serum (B) exhaled breath condensate (EBC) and (C) bronchoalveolar lavage fluid (BALF) measured at 300 K, 800 MHz. Assigned numbers indicate the following metabolites:

(A) 1, TSP; 2, lipid; 3, isoleucine; 4, valine; 5, L-leucine; 6, propylene glycol; 7, isopropyl alcohol; 8, 3-hydroxybutyric acid; 9, lactic acid; 10, L-lysine; 11, L-alanine; 12, adipic acid; 13, acetic acid; 14, proline; 15, N-acetyl glycoproteins; 16, glutamine; 17, acetone; 18, glutamate; 19, pyruvate; 20, succinate; 21, citrate; 22, asparagine; 23, creatine; 24, ornithine; 25, carnitine; 26, glucose; 27, betaine; 28, glycine; 29, glycerol; 30, histidine; 31, creatinine; 32, threonine 33, tyrosine; 34, phenylalanine; 35, formate.

(B) 1, TSP; 2, fatty acid; 3, propionate; 4, isopropanol; 5, ethanol; 6, lactate; 7, threonine; 8, alanine; 9, acetate; 10, proline; 11, acetone; 12, valine; 13, pyruvate; 14, trimethylamine; 15, methanol; 16, glycerol; 17, phenylalanine; 18, formate

(C) 1, TSP; 2, fatty acid; 3, valine; 4, ethanol; 5, threonine; 6, lactate; 7, alanine; 8, acetate; 9, proline; 10, glutamate; 11, methionine; 12, acetone; 13, pyruvate; 14, succinate; 15, ornithine; 16, arginine; 17, betaine; 18, glycerol; 19, creatine; 20, choline; 21, gluconic acid; 22, tyrosine; 23, tryptophan; 24, phenylalanine; 25, histidine; 26, formate

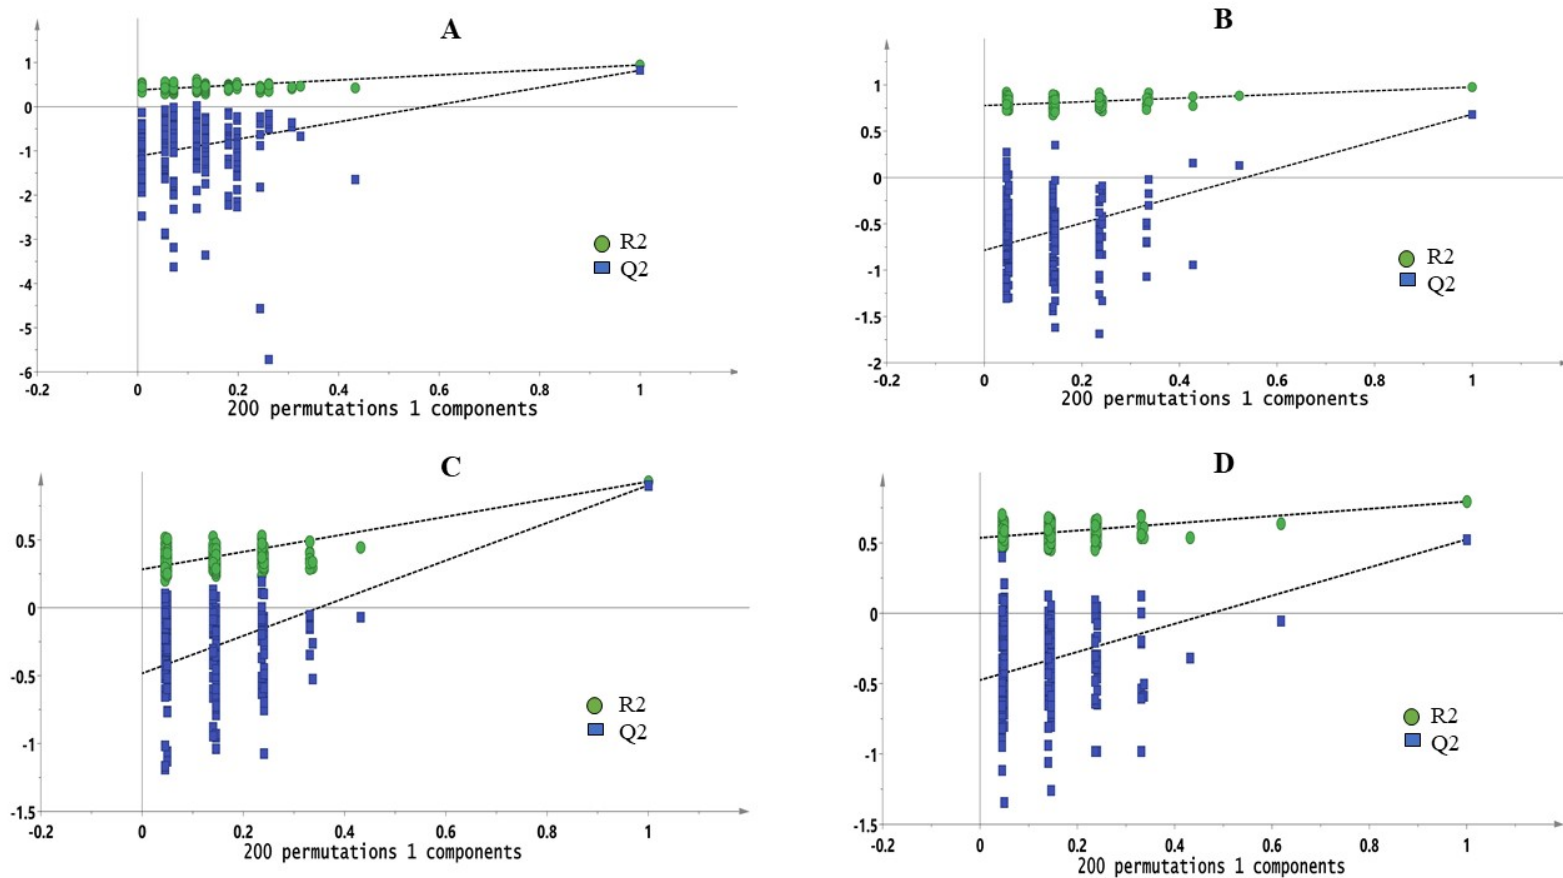

**Fig. S2** Permutation tests indicating predictive ability of orthogonal partial least squares discriminant analysis (OPLS-DA) model for hypersensitivity pneumonitis (HP) and healthy controls. (A) indicates serum and (B) represents exhaled breath condensate (EBC) of discovery cohort. (C) indicates serum and (D) represents EBC of the validation cohort.

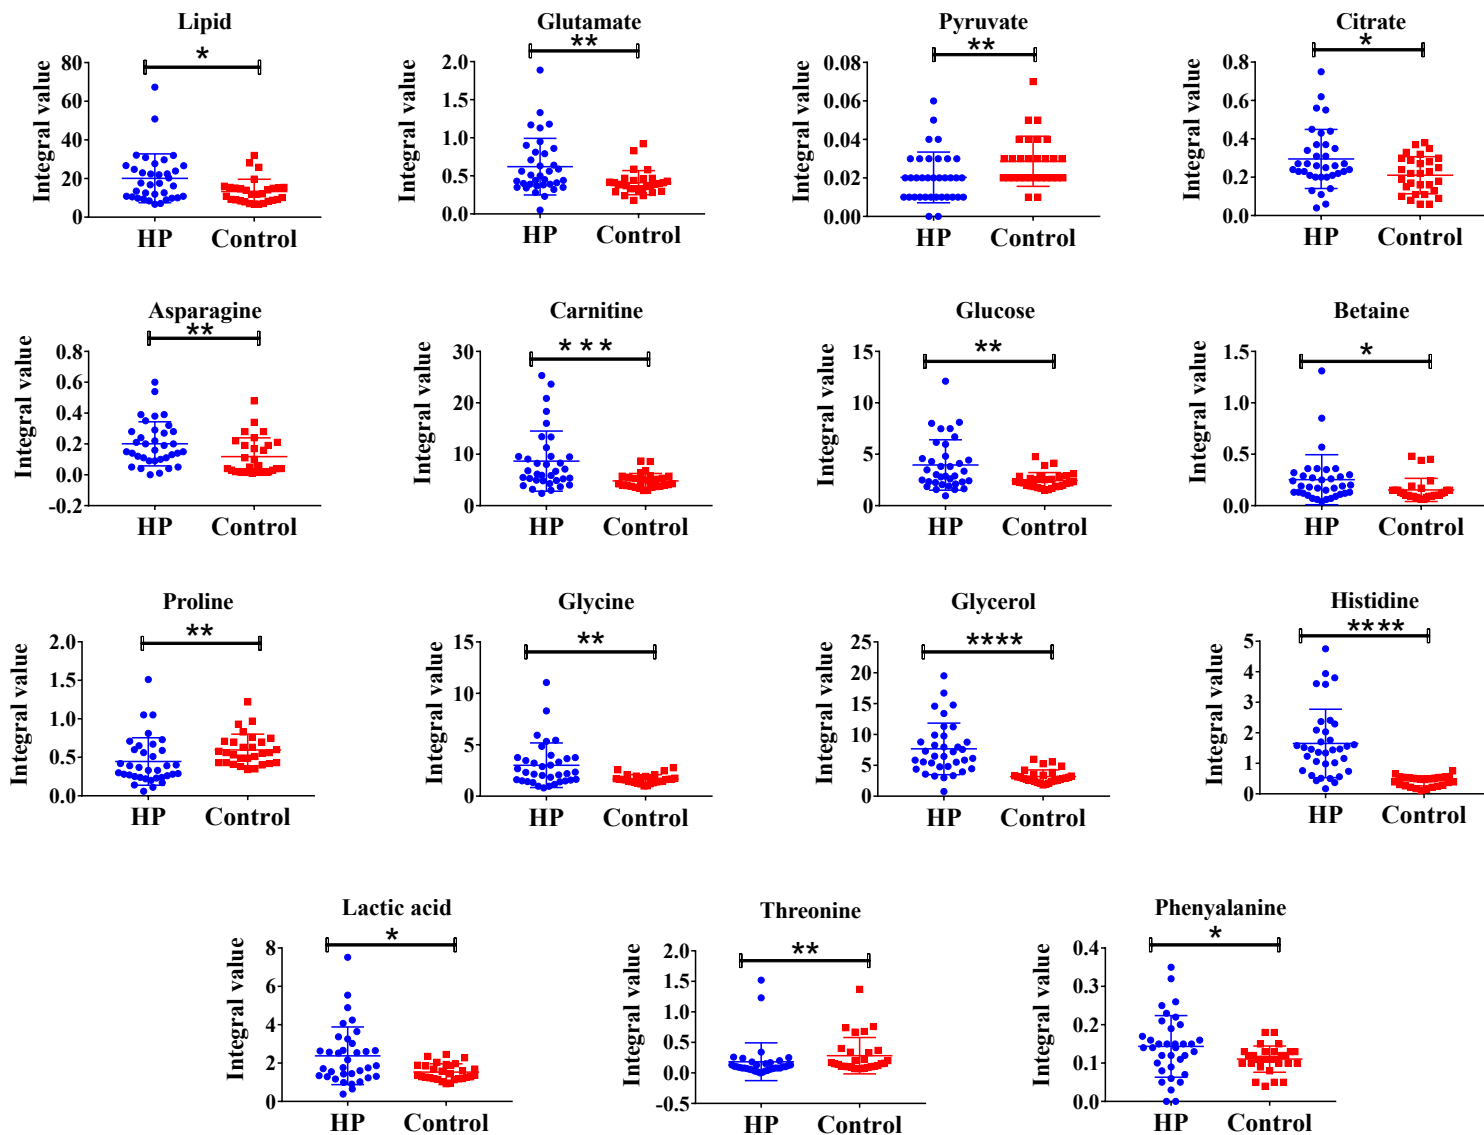

**Fig. S3** Scatter plots of significantly altered metabolites in serum of HP patients as compared with controls.  
 \*p value < 0.05; \*\*p value < 0.01; \*\*\*p value < 0.001

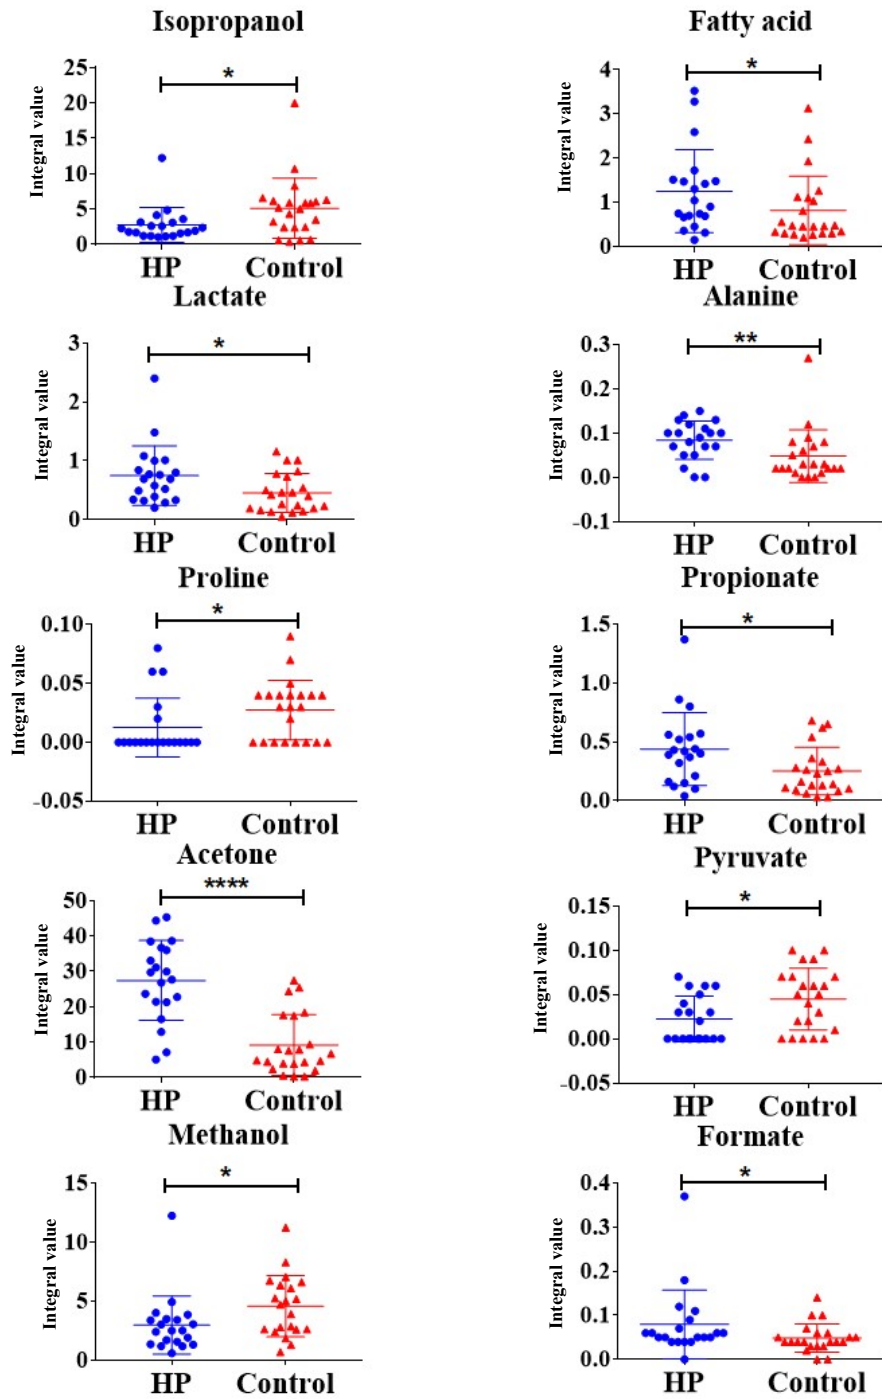

**Fig. S4**

Scatter plots of significantly altered metabolites in exhaled breath condensate (EBC) of HP patients as compared with controls.

\*p value < 0.05; \*\*p value < 0.01; \*\*\*p value < 0.001

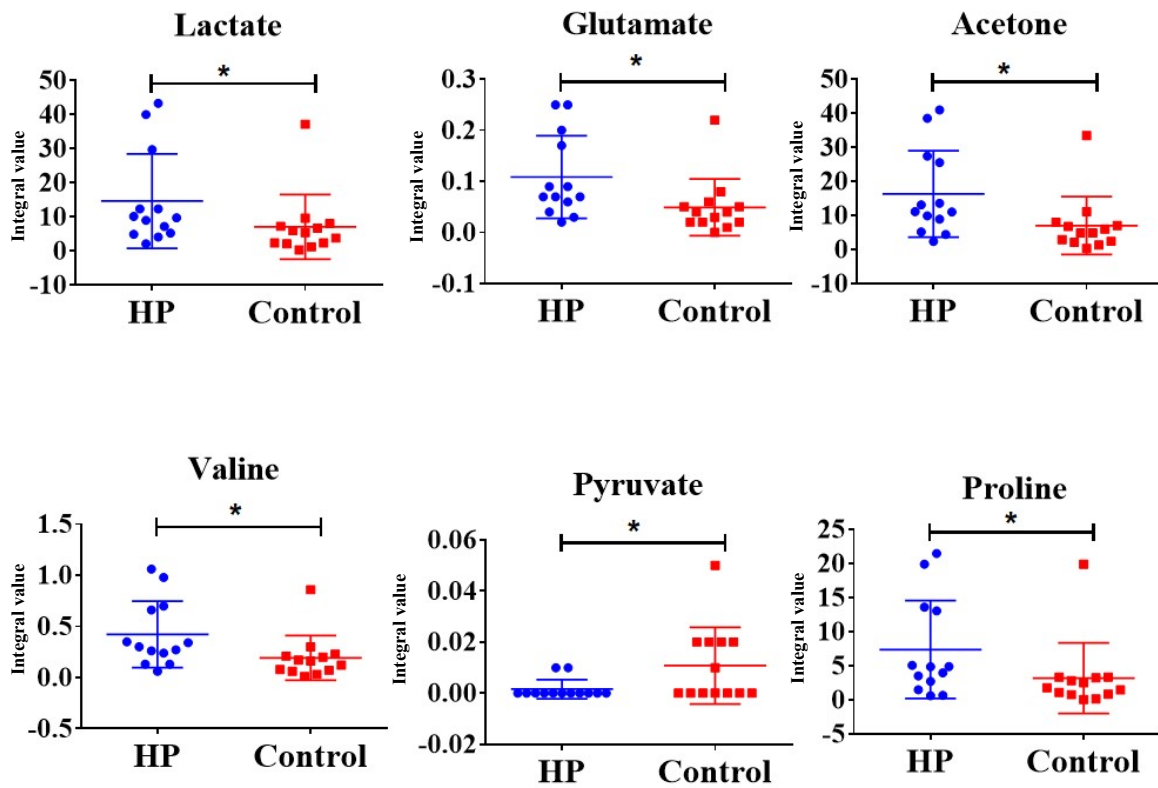

**Fig. S5** Scatter plots of significantly altered metabolites in bronchoalveolar lavage fluid (BALF) of HP patients as compared with controls.  
\*p value < 0.05



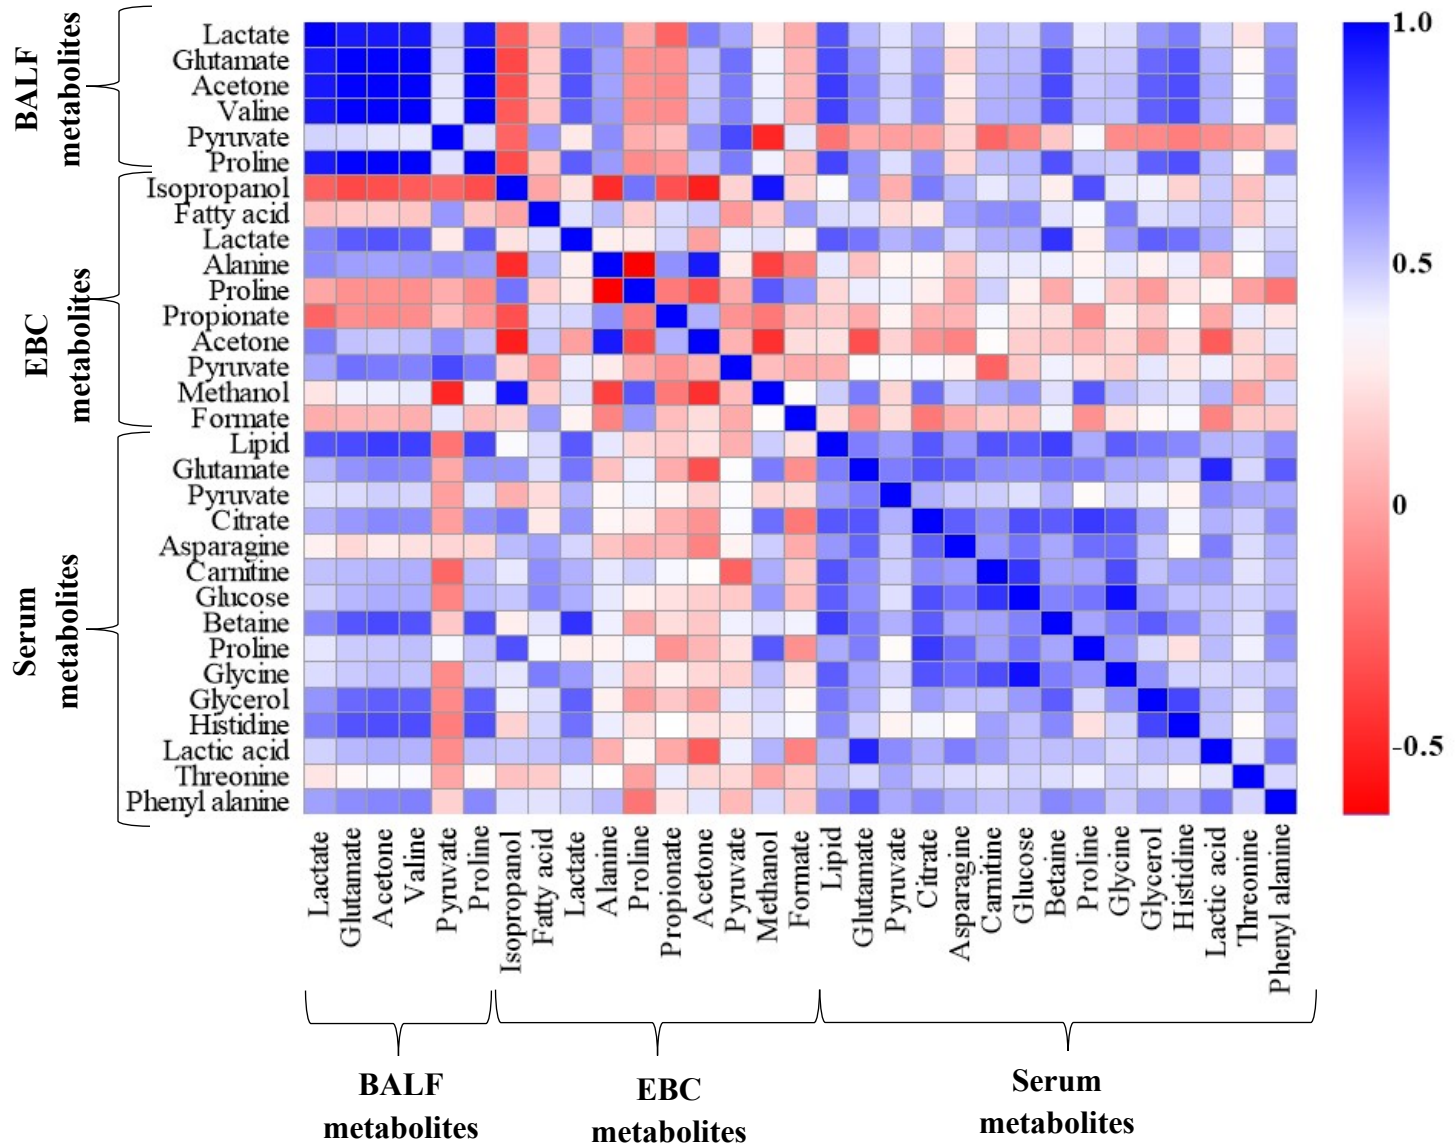

**Fig. S6** Pearson's correlation heatmap shows association between dysregulated serum, exhaled breath condensate (EBC) and bronchoalveolar lavage fluid (BALF) metabolites in patients with HP as compared with controls.

Blue squares—positive correlation, red squares—negative correlation ( $p$  value < 0.05)

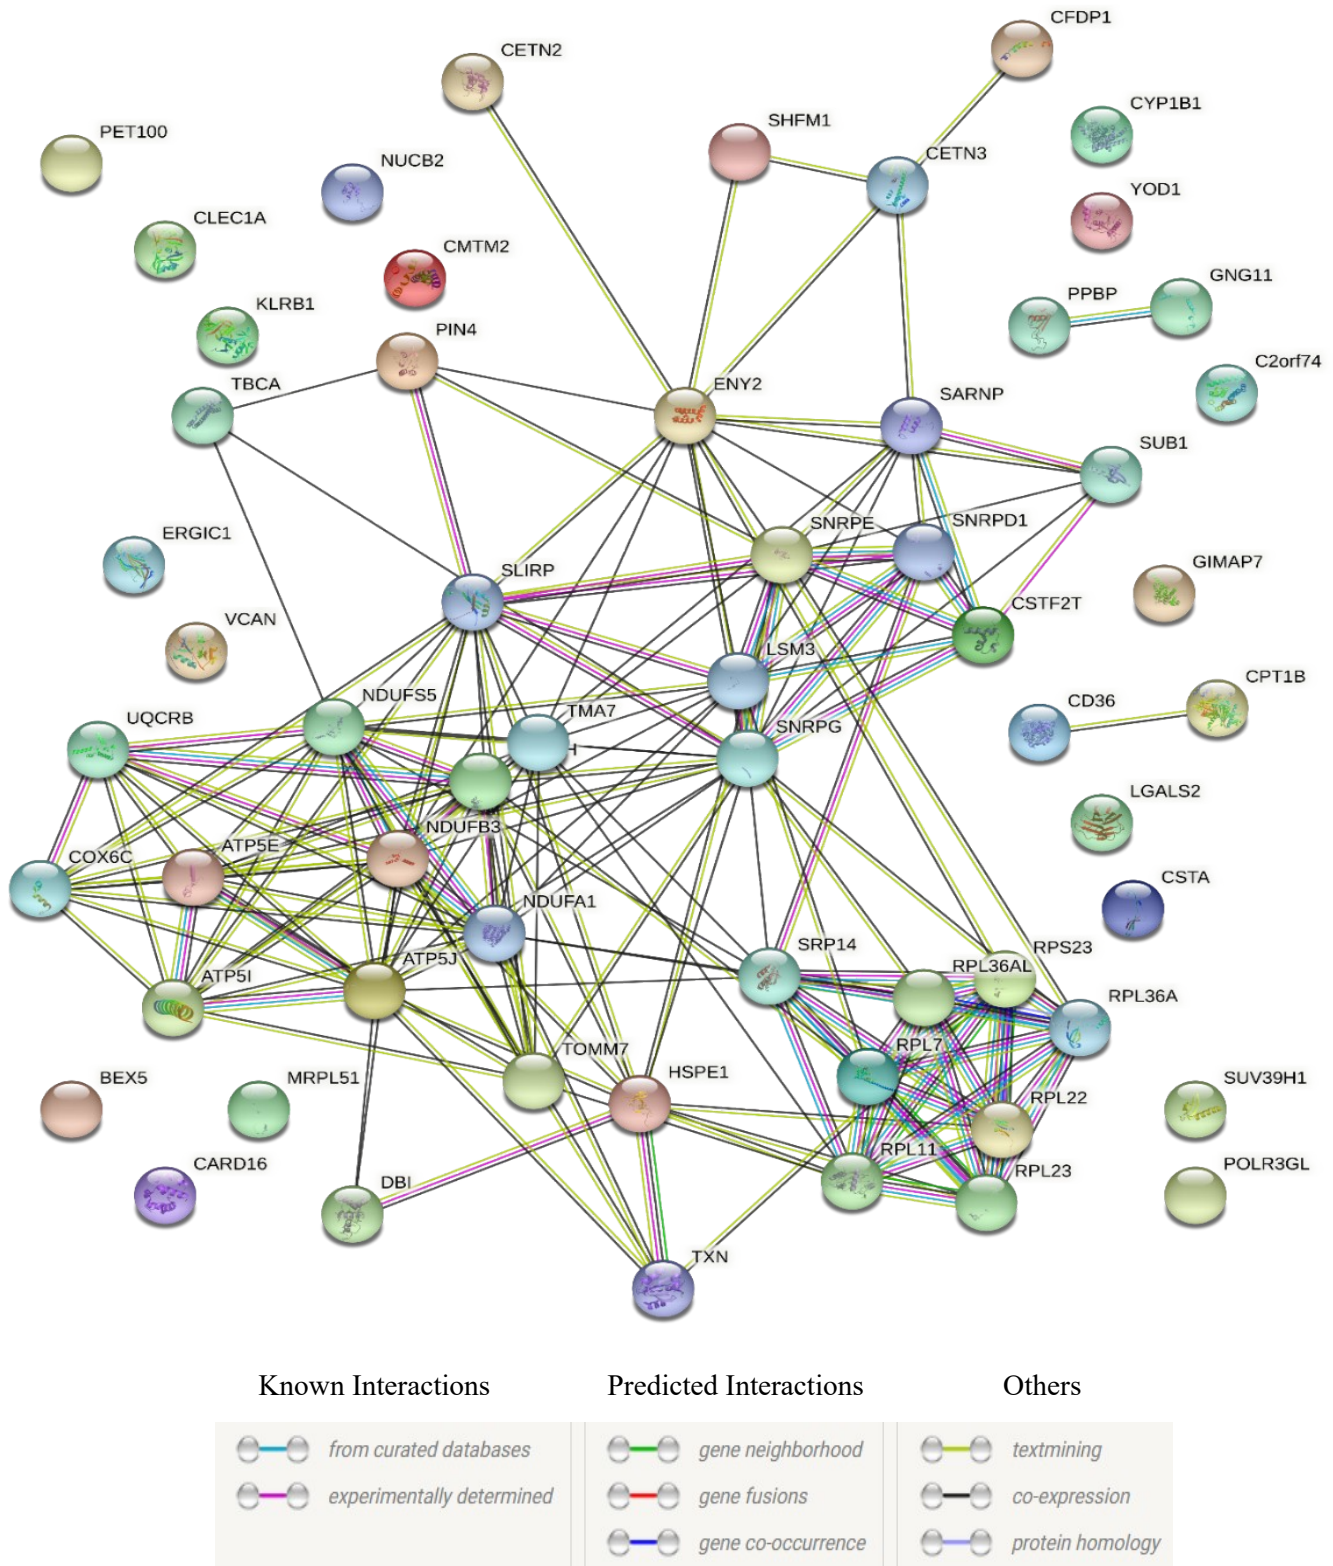

**Fig. S7** A total of 59 significantly altered genes identified in patients with HP were used for protein interaction network (PPI) using STRING database. Different colored edges show protein-protein interactions. The network has 60 nodes and 179 edges

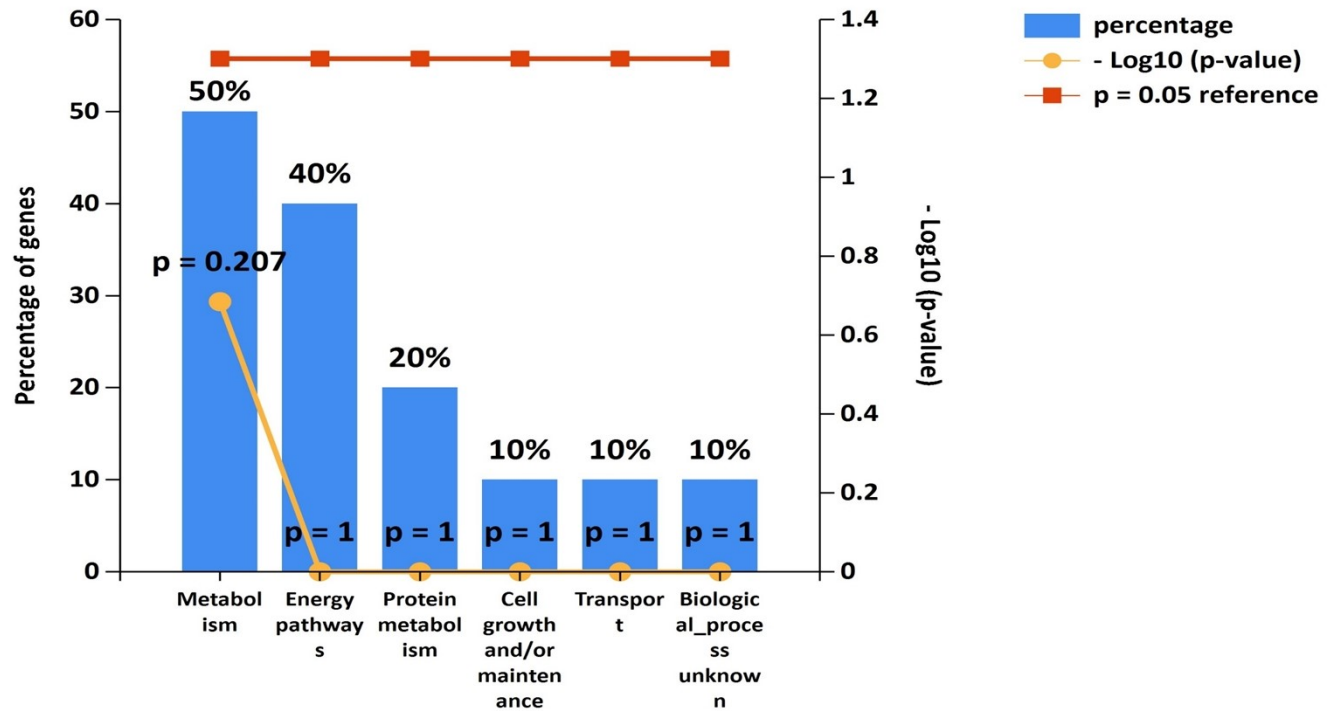

**Fig. S8** Ten most significantly altered genes identified in patients with HP were used for functional enrichment analysis with a stand-alone software tool FunRich (Functional Enrichment analysis tool) version 3.1.3. Biological process enrichment analysis of the dysregulated genes is shown.

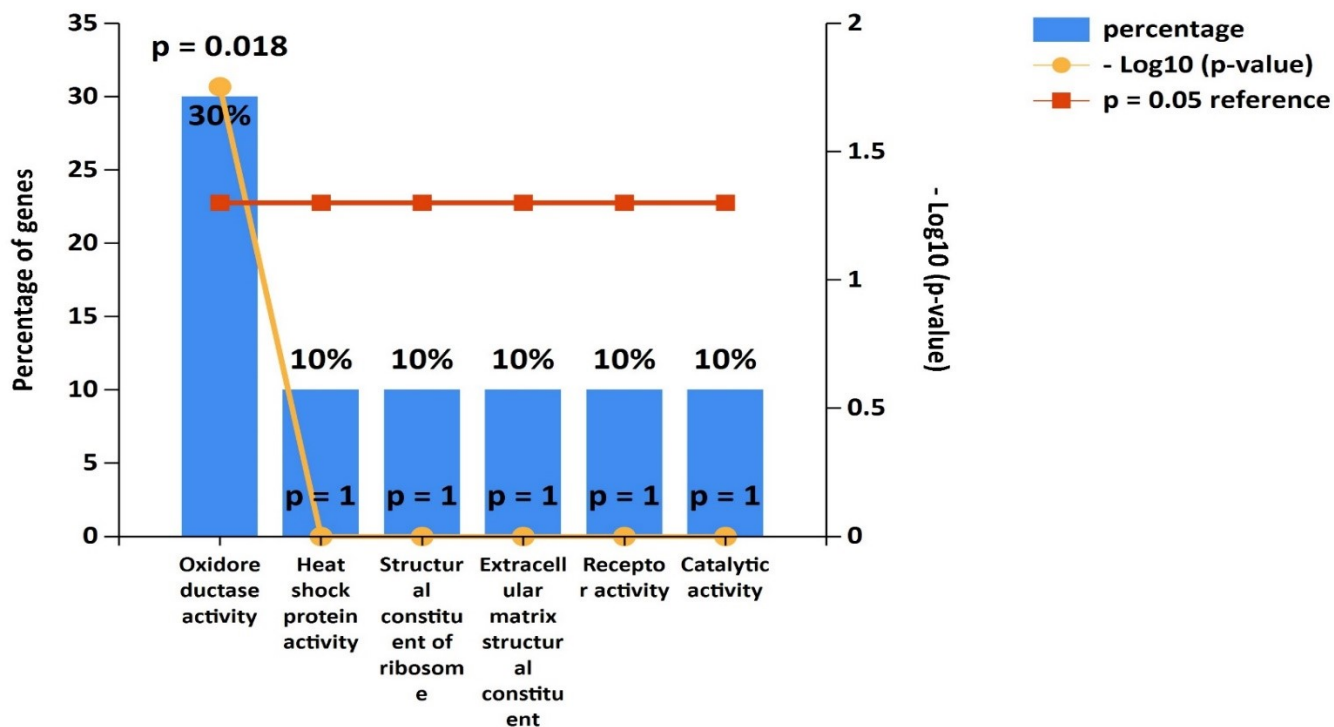

**Fig. S9** Ten most significantly altered genes identified in patients with HP were used for functional enrichment analysis with a stand-alone software tool FunRich (Functional Enrichment analysis tool) version 3.1.3. Molecular function enrichment analysis of the dysregulated genes is shown

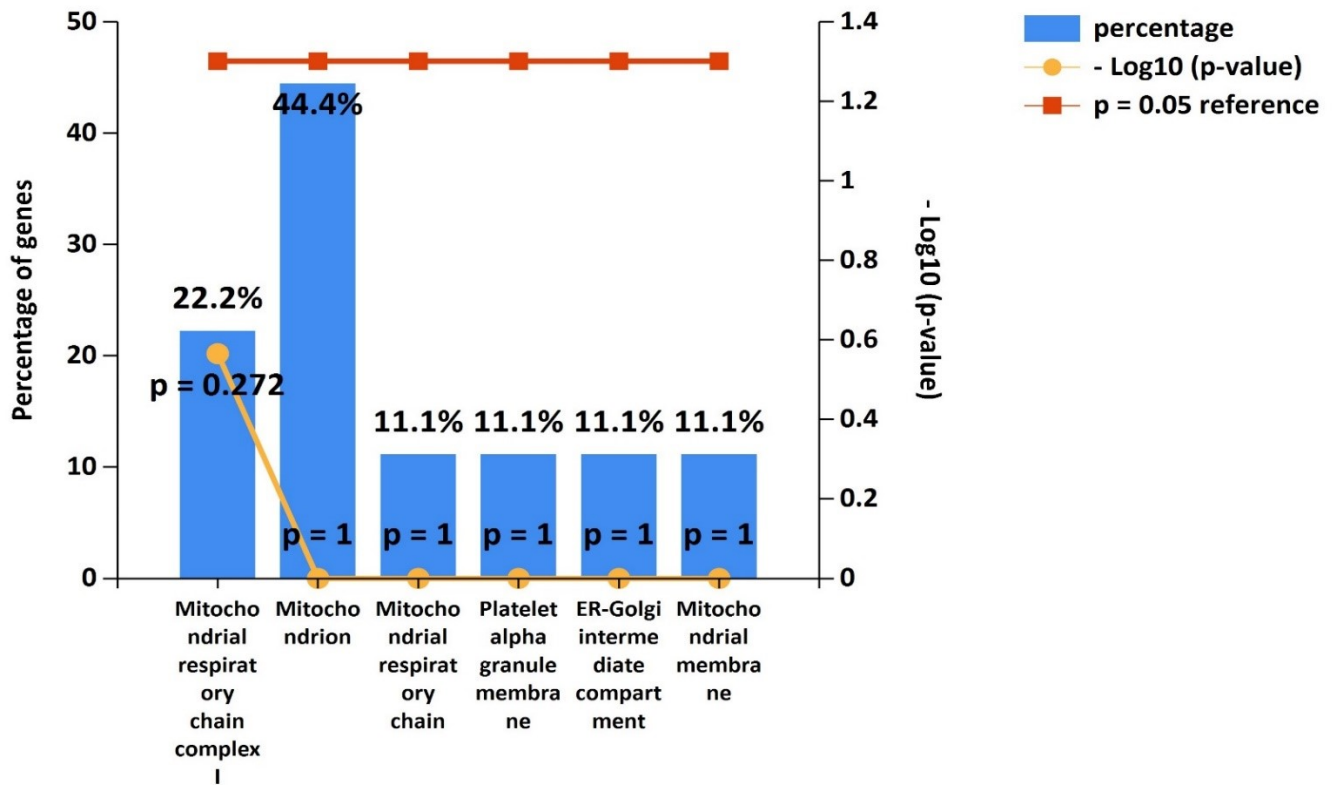

**Fig. S10** Ten most significantly altered genes identified in patients with HP were used for functional enrichment analysis with a stand-alone software tool FunRich (Functional Enrichment analysis tool) version 3.1.3. Cellular component enrichment analysis of the dysregulated genes is shown

**Table S1** Integral values of all identified metabolites in serum of hypersensitivity pneumonitis (HP) subjects as compared to controls (discovery cohort)

| <b>Metabolites</b>     | <b>Chemical shift (ppm)</b> | <b>Controls</b> | <b>HP</b>   |
|------------------------|-----------------------------|-----------------|-------------|
| Lipid                  | 0.90                        | 13.31±6.35      | 20.11±12.64 |
| Isoleucine             | 0.96                        | 0.20±0.06       | 0.49±1.43   |
| Valine                 | 0.99                        | 0.59±0.21       | 0.66±0.46   |
| L-leucine              | 1.01                        | 0.76±0.23       | 0.81±0.55   |
| Isoleucine             | 1.04                        | 0.27±0.10       | 0.30±0.17   |
| Valine                 | 1.07                        | 0.76±0.20       | 0.85±0.51   |
| Propylene glycol       | 1.13                        | 0.01±0.008      | 0.01±0.01   |
| Isopropyl alcohol      | 1.17                        | 1.17±3.31       | 2.62±2.24   |
| 3 hydroxybutyric acid  | 1.19                        | 0.03±0.02       | 0.07±0.09   |
| Lipid                  | 1.32                        | 28.61±18.83     | 36.82±25.88 |
| Lactic acid            | 1.36                        | 7.74±2.18       | 11.40±8.72  |
| Lysine                 | 1.42                        | 0.20±0.17       | 0.24±0.14   |
| L-alanine              | 1.5                         | 1.38±0.42       | 1.62±0.82   |
| Adipic acid            | 1.60                        | 0.90±0.89       | 1.14±1.29   |
| Lysine                 | 1.75                        | 0.85±0.21       | 0.89±0.47   |
| Lysine                 | 1.90                        | 0.33±0.11       | 0.42±0.29   |
| Acetic acid            | 1.94                        | 0.08±0.04       | 0.11±0.11   |
| Proline                | 2.04                        | 1.15±1.21       | 1.19±1.35   |
| N- acetyl glycoprotein | 2.07                        | 5.03±3.30       | 8.01±6.82   |
| L-glutamine            | 2.16                        | 1.46±0.40       | 1.46±0.83   |
| Acetone                | 2.26                        | 0.84±0.42       | 0.77±0.50   |
| Valine                 | 2.29                        | 0.76±0.85       | 0.44±0.57   |
| Glutamate              | 2.38                        | 0.41±0.15       | 0.62±0.37   |
| Pyruvate               | 2.42                        | 0.03±0.01       | 0.02±0.01   |
| Succinate              | 2.43                        | 0.04±0.02       | 0.04±0.03   |
| Glutamine              | 2.46                        | 1.03±0.28       | 1.02±0.54   |
| Citrate                | 2.55                        | 0.20±0.06       | 0.25±0.14   |
| Asparagine             | 2.67                        | 0.14±0.10       | 0.11±0.08   |
| Citrate                | 2.71                        | 0.21±0.09       | 0.29±0.15   |
| Asparagine             | 2.93                        | 0.11±0.12       | 0.20±0.14   |
| Lysine                 | 3.04                        | 0.55±0.26       | 0.66±0.51   |
| Creatine               | 3.06                        | 0.26±0.06       | 0.32±0.17   |
| Ornithine              | 3.07                        | 0.07±0.06       | 0.08±0.07   |
| Carnitine              | 3.24                        | 4.82±1.44       | 8.66±5.84   |
| Glucose                | 3.29                        | 2.44±0.77       | 3.95±2.45   |
| Betaine                | 3.31                        | 0.15±0.11       | 0.25±0.24   |
| Proline                | 3.35                        | 0.59±0.20       | 0.44±0.30   |

|               |      |            |            |
|---------------|------|------------|------------|
| Glucose       | 3.44 | 4.08±1.07  | 7.23±5.19  |
| Glucose       | 3.50 | 3.03±0.82  | 5.83±4.12  |
| Glycine       | 3.52 | 1.66±0.43  | 3.01±2.16  |
| Glycerol      | 3.57 | 3.17±1.07  | 7.67±4.18  |
| Glycerol      | 3.77 | 7.46±2.14  | 13.51±8.35 |
| Glucose       | 3.86 | 2.98±0.85  | 5.40±3.85  |
| Glucose       | 3.93 | 2.92±0.89  | 5.43±3.42  |
| Histidine     | 4.00 | 0.42±0.16  | 1.65±1.12  |
| Creatinine    | 4.08 | 0.14±0.04  | 0.19±0.10  |
| Lactic acid   | 4.15 | 1.53±0.42  | 2.37±1.50  |
| Threonine     | 4.26 | 0.28±0.29  | 0.18±0.30  |
| Glucose       | 5.27 | 1.22±0.33  | 2.25±1.61  |
| Tyrosine      | 6.91 | 0.10±0.03  | 0.14±0.07  |
| Histidine     | 7.06 | 0.06±0.01  | 0.07±0.04  |
| Tyrosine      | 7.21 | 0.11±0.03  | 0.14±0.07  |
| Phenylalanine | 7.35 | 0.11±0.03  | 0.14±0.08  |
| Phenylalanine | 7.39 | 0.03±0.02  | 0.06±0.06  |
| Phenylalanine | 7.44 | 0.09±0.03  | 0.10±0.07  |
| Histidine     | 7.76 | 0.05±0.01  | 0.06±0.04  |
| Formate       | 8.49 | 0.01±0.003 | 0.01±0.008 |



**Table S2** Integral values of all identified metabolites in serum of HP subjects as compared to controls (validation cohort)

| <b>Metabolites</b>     | <b>Chemical shift (ppm)</b> | <b>Controls</b> | <b>HP</b>   |
|------------------------|-----------------------------|-----------------|-------------|
| Lipid                  | 0.90                        | 14.33±7.65      | 36.46±20.62 |
| Isoleucine             | 0.96                        | 0.36±0.52       | 0.38±0.23   |
| Valine                 | 0.99                        | 0.56±0.22       | 1.37±1.52   |
| L-leucine              | 1.01                        | 0.73±0.22       | 1.26±0.65   |
| Isoleucine             | 1.04                        | 0.25±0.08       | 0.40±0.21   |
| Valine                 | 1.07                        | 0.69±0.21       | 1.19±0.63   |
| Propylene glycol       | 1.13                        | 0.015±0.01      | 0.03±0.02   |
| Isopropyl alcohol      | 1.17                        | 0.39±0.43       | 0.65±1.10   |
| 3 hydroxybutyric acid  | 1.19                        | 0.03±0.03       | 0.09±0.08   |
| Lipid                  | 1.32                        | 30.39±21.90     | 67.16±43.20 |
| Lactic acid            | 1.36                        | 8.99±5.38       | 14.07±7.93  |
| Lysine                 | 1.42                        | 0.23±0.26       | 0.53±0.45   |
| L-alanine              | 1.50                        | 1.35±0.39       | 2.24±1.18   |
| Adipic acid            | 1.60                        | 1.14±1.22       | 2.54±2.04   |
| Lysine                 | 1.75                        | 0.76±0.24       | 1.25±0.60   |
| Lysine                 | 1.90                        | 0.36±0.18       | 0.57±0.42   |
| Acetic acid            | 1.94                        | 0.08±0.06       | 0.11±0.10   |
| Proline                | 2.04                        | 1.15±1.36       | 3.41±5.51   |
| N- acetyl glycoprotein | 2.07                        | 6.67±3.94       | 10.76±11.12 |
| L-glutamine            | 2.16                        | 1.31±0.49       | 2.31±1.04   |
| Acetone                | 2.26                        | 0.80±0.47       | 0.80±0.31   |
| Valine                 | 2.29                        | 1.02±0.97       | 1.13±1.38   |
| Glutamate              | 2.38                        | 0.38±0.13       | 0.93±0.63   |
| Pyruvate               | 2.42                        | 0.04±0.07       | 0.02±0.01   |
| Succinate              | 2.43                        | 0.06±0.07       | 0.06±0.03   |
| Glutamine              | 2.46                        | 1.00±0.33       | 1.61±0.77   |
| Citrate                | 2.55                        | 0.18±0.05       | 0.31±0.17   |
| Asparagine             | 2.67                        | 0.09±0.05       | 0.16±0.15   |
| Citrate                | 2.71                        | 0.22±0.09       | 0.38±0.21   |
| Asparagine             | 2.93                        | 0.09±0.09       | 0.30±0.18   |
| Lysine                 | 3.04                        | 0.60±0.31       | 1.24±0.95   |
| Creatine               | 3.06                        | 0.32±0.26       | 0.44±0.20   |
| Ornithine              | 3.07                        | 0.07±0.05       | 0.12±0.11   |
| Carnitine              | 3.24                        | 5.19±3.13       | 12.50±6.53  |
| Glucose                | 3.29                        | 2.37±0.80       | 5.08±2.69   |



|               |      |            |            |
|---------------|------|------------|------------|
| Betaine       | 3.31 | 0.13±0.10  | 0.27±0.18  |
| Proline       | 3.35 | 0.59±0.22  | 0.29±0.27  |
| Glucose       | 3.44 | 4.14±1.64  | 9.36±4.94  |
| Glucose       | 3.50 | 2.98±1.26  | 7.69±4.15  |
| Glycine       | 3.52 | 1.64±0.66  | 3.99±2.23  |
| Glycerol      | 3.57 | 2.60±0.92  | 11.68±7.24 |
| Glycerol      | 3.77 | 7.21±2.77  | 18.29±9.43 |
| Glucose       | 3.86 | 2.97±1.35  | 7.25±4.17  |
| Glucose       | 3.93 | 2.91±1.19  | 7.21±3.77  |
| Histidine     | 4.00 | 0.40±0.20  | 2.36±1.64  |
| Creatine      | 4.08 | 0.12±0.03  | 0.22±0.11  |
| Lactic acid   | 4.15 | 1.47±0.41  | 3.10±1.95  |
| Threonine     | 4.26 | 0.36±0.42  | 0.15±0.08  |
| Glucose       | 5.27 | 1.19±0.60  | 2.80±1.79  |
| Tyrosine      | 6.91 | 0.10±0.03  | 0.17±0.08  |
| Histidine     | 7.06 | 0.06±0.01  | 0.10±0.04  |
| Tyrosine      | 7.21 | 0.10±0.03  | 0.18±0.07  |
| Phenylalanine | 7.35 | 0.10±0.05  | 0.17±0.11  |
| Phenylalanine | 7.39 | 0.02±0.02  | 0.04±0.06  |
| Phenylalanine | 7.44 | 0.08±0.04  | 0.11±0.11  |
| Histidine     | 7.76 | 0.05±0.01  | 0.09±0.04  |
| Formate       | 8.49 | 0.01±0.004 | 0.01±0.01  |

**Table S3** Integral values of all identified metabolites in exhaled breath condensate (EBC) of HP subjects as compared to controls (discovery cohort)

| <b>Metabolites</b> | <b>Chemical shift (ppm)</b> | <b>Controls</b> | <b>HP</b>   |
|--------------------|-----------------------------|-----------------|-------------|
| Fatty acid         | 0.90                        | 0.27±0.33       | 0.31±0.22   |
| Propionate         | 1.06                        | 0.78±1.25       | 0.73±0.90   |
| Isopropanol        | 1.18                        | 5.11±4.26       | 2.76±2.46   |
| Ethanol            | 1.2                         | 1.65±2.45       | 0.64±0.48   |
| Fatty acid         | 1.25                        | 0.81±0.77       | 1.25±0.93   |
| Lactate            | 1.33                        | 0.45±0.32       | 0.74±0.50   |
| Threonine          | 1.38                        | 0.16±0.41       | 0.32±0.65   |
| Alanine            | 1.48                        | 0.04±0.05       | 0.08±0.04   |
| Acetate            | 1.93                        | 1.63±1.70       | 2.36±2.85   |
| Proline            | 2.07                        | 0.02±0.02       | 0.01±0.02   |
| Propionate         | 2.18                        | 0.25±0.20       | 0.43±0.31   |
| Acetone            | 2.23                        | 9.18±8.56       | 27.45±11.31 |
| Valine             | 2.24                        | 0.07±0.32       | 0.34±1.22   |
| Pyruvate           | 2.39                        | 0.04±0.03       | 0.02±0.02   |
| Trimethylamine     | 2.9                         | 0.02±0.02       | 0.02±0.05   |
| Methanol           | 3.36                        | 4.58±2.60       | 2.98±2.46   |
| Glycerol           | 3.66                        | 2.29±1.72       | 1.78±1.49   |
| Phenylalanine      | 7.33                        | 0.01±0.02       | 0.001±0.004 |
| Formate            | 8.46                        | 0.04±0.03       | 0.07±0.07   |

**Table S4** Integral values of all identified metabolites in exhaled breath condensate (EBC) of HP subjects as compared to controls (validation cohort)

| <b>Metabolites</b> | <b>Chemical shift (ppm)</b> | <b>Controls</b> | <b>HP</b> |
|--------------------|-----------------------------|-----------------|-----------|
| Fatty acid         | 0.90                        | 0.44±0.60       | 0.58±0.40 |
| Propionate         | 1.06                        | 0.35±0.42       | 0.87±0.91 |
| Isopropanol        | 1.18                        | 4.47±3.39       | 1.62±3.07 |
| Ethanol            | 1.2                         | 4.91±4.27       | 1.35±1.12 |
| Fatty acid         | 1.25                        | 1.48±1.94       | 1.28±1.38 |
| Lactate            | 1.33                        | 0.42±0.63       | 0.73±0.81 |
| Threonine          | 1.38                        | 0.06±0.06       | 0.19±0.23 |
| Alanine            | 1.48                        | 0.01±0.02       | 0.02±0.02 |
| Acetate            | 1.93                        | 1.29±1.23       | 2.57±2.08 |
| Proline            | 2.07                        | 0.03±0.02       | 0.01±0.01 |
| Propionate         | 2.18                        | 0.22±0.26       | 0.63±0.65 |
| Acetone            | 2.23                        | 3.28±3.59       | 2.20±0.53 |
| Valine             | 2.24                        | 0.06±0.18       | 0.04±0.04 |
| Pyruvate           | 2.39                        | 0.03±0.01       | 0.01±0.01 |
| Trimethylamine     | 2.9                         | 0.03±0.02       | 0.02±0.02 |
| Methanol           | 3.36                        | 5.70±3.70       | 2.05±0.84 |
| Glycerol           | 3.66                        | 4.43±4.07       | 1.11±0.91 |
| Phenylalanine      | 7.33                        | 0.02±0.07       | 0.05±0.03 |
| Formate            | 8.46                        | 0.06±0.09       | 0.08±0.05 |

**Table S5** Integral values of all identified metabolites in bronchoalveolar lavage fluid (BALF) of HP subjects as compared to controls (non-HP)

| <b>Metabolites</b> | <b>Chemical shift (ppm)</b> | <b>Controls (non-HP)</b> | <b>HP</b>   |
|--------------------|-----------------------------|--------------------------|-------------|
| Valine             | 1.07                        | 0.12±0.14                | 0.10±0.05   |
| Ethanol            | 1.15                        | 19.41±23.85              | 15.08±8.43  |
| Threonine          | 1.33                        | 0.19±0.24                | 0.10±0.05   |
| Lactate            | 1.36                        | 7.07±9.48                | 14.62±13.82 |
| Alanine            | 1.48                        | 0.03±0.03                | 0.01±0.01   |
| Acetate            | 1.92                        | 0.14±0.09                | 0.17±0.08   |
| Proline            | 2.04                        | 0.39±0.46                | 0.26±0.29   |
| Glutamate          | 2.13                        | 0.04±0.05                | 0.10±0.08   |
| Methionine         | 2.16                        | 0.01±0.01                | 0.01±0.01   |
| Acetone            | 2.21                        | 7.02±8.49                | 16.31±12.70 |
| Valine             | 2.28                        | 0.19±0.21                | 0.42±0.32   |
| Pyruvate           | 2.37                        | 0.01±0.01                | 0.001±0.003 |
| Succinate          | 2.41                        | 0.009±0.01               | 0.004±0.008 |
| Creatine           | 3.04                        | 0.01±0.009               | 0.009±0.006 |
| Tyrosine           | 3.15                        | 0.01±0.02                | 0.006±0.01  |
| Arginine           | 3.22                        | 0.07±0.06                | 0.04±0.04   |
| Betaine            | 3.27                        | 0.02±0.02                | 0.03±0.03   |
| Proline            | 3.35                        | 3.16±5.16                | 7.37±7.18   |
| Glucose            | 3.45                        | 7.29±9.21                | 5.33±2.84   |
| Ethanol            | 3.62                        | 0.35±0.45                | 0.22±0.13   |
| Glycerol           | 3.66                        | 0.32±0.19                | 0.33±0.19   |
| Glucose            | 3.71                        | 0.06±0.07                | 0.08±0.05   |
| Glutamate          | 3.79                        | 0.01±0.01                | 0.006±0.01  |
| Glucose            | 3.89                        | 4.98±6.28                | 3.84±1.89   |
| Tyrosine           | 4.00                        | 0.01±0.02                | 0.01±0.03   |
| Gluconic acid      | 4.11                        | 0.03±0.03                | 0.02±0.01   |
| Threonine          | 4.24                        | 0.92±1.90                | 2.32±2.50   |
| Tyrosine           | 6.96                        | 0.07±0.10                | 0.16±0.13   |
| Tryptophan         | 7.26                        | 1.25±1.49                | 1.57±0.73   |
| Phenylalanine      | 7.3                         | 0.02±0.03                | 0.04±0.05   |
| Histidine          | 7.82                        | 0.009±0.01               | 0.008±0.01  |
| Formate            | 8.46                        | 0.01±0.007               | 0.01±0.008  |

**Table S6** Differentially expressed genes (DEGs) of HP subjects as compared to controls

| <b>Downregulated</b> |                           |                |                         |               |
|----------------------|---------------------------|----------------|-------------------------|---------------|
| <b>ID</b>            | <b>Average expression</b> | <b>P value</b> | <b>Adjusted p value</b> | <b>Log FC</b> |
| CARD16               | 10.24789                  | 8.22E-05       | 0.019838                | -1.03802      |
| C2orf74              | 7.210272                  | 0.000626       | 0.074903                | -1.33064      |
| SRP14                | 10.99894                  | 2.88E-10       | 1.31E-06                | -1.15516      |
| RPL11                | 10.39968                  | 0.000364       | 0.052817                | -1.18164      |
| RPL7                 | 12.02689                  | 1.11E-05       | 0.00511                 | -1.14287      |
| RPL23                | 11.73195                  | 0.000139       | 0.027651                | -1.31674      |
| RPS23                | 12.63192                  | 2.76E-11       | 1.67E-07                | -1.19123      |
| RPL36A               | 10.34827                  | 1.53E-06       | 0.001229                | -1.99295      |
| COX6C                | 9.987171                  | 0.000169       | 0.031569                | -1.70249      |
| NDUFS5               | 10.32554                  | 3.37E-10       | 1.42E-06                | -1.94756      |
| TOMM7                | 10.66048                  | 2.25E-05       | 0.008142                | -1.39207      |
| LSM3                 | 8.083385                  | 6.91E-06       | 0.003631                | -1.59503      |
| UQCRH                | 10.01942                  | 1.65E-06       | 0.001268                | -1.13621      |
| SEM1                 | 9.749123                  | 6.53E-09       | 1.98E-05                | -1.6944       |
| NDUFA1               | 10.30143                  | 1.55E-14       | 4.24E-10                | -2.11598      |
| ATP5PF               | 10.51079                  | 6.24E-08       | 0.000103                | -1.33031      |
| DBI                  | 9.374304                  | 1.15E-05       | 0.005214                | -1.41926      |
| SNRPD1               | 8.347551                  | 2.61E-08       | 5.95E-05                | -1.54438      |
| CFDP1                | 8.393305                  | 3.75E-10       | 1.46E-06                | -1.16125      |
| SNRPE                | 9.800555                  | 7.16E-08       | 0.000112                | -1.52537      |
| NDUFB3               | 7.950478                  | 1.62E-06       | 0.001266                | -1.16262      |
| TBCA                 | 8.443308                  | 4.03E-07       | 0.000408                | -1.24206      |
| NUCB2                | 9.760718                  | 4.00E-06       | 0.002456                | -1.22225      |
| GNG11                | 8.036379                  | 6.01E-05       | 0.016111                | -1.31566      |
| PIN4                 | 8.964413                  | 0.000127       | 0.026462                | -1.09043      |
| CSTA                 | 10.57433                  | 9.68E-07       | 0.000853                | -1.336        |
| HSPE1                | 9.755914                  | 5.66E-09       | 1.82E-05                | -2.01688      |
| SNRPG                | 10.17753                  | 8.38E-05       | 0.020058                | -1.13197      |
| UQCRB                | 9.74728                   | 1.90E-12       | 1.87E-08                | -2.57168      |
| ATP5ME               | 9.074964                  | 4.32E-08       | 8.14E-05                | -1.3424       |
| RPL36AL              | 11.19874                  | 4.10E-16       | 2.24E-11                | -1.58784      |
| LGALS2               | 9.071441                  | 0.000933       | 0.096583                | -1.79732      |
| RPL22                | 12.38711                  | 1.03E-13       | 1.87E-09                | -1.50538      |
| TXN                  | 9.294564                  | 1.77E-05       | 0.006882                | -1.01231      |
| CETN2                | 8.76321                   | 2.45E-08       | 5.92E-05                | -1.01747      |
| CETN3                | 6.948075                  | 0.000899       | 0.094322                | -1.20798      |
| SUB1                 | 10.37239                  | 5.35E-08       | 9.44E-05                | -1.4188       |
| PPBP                 | 11.39095                  | 4.93E-05       | 0.013896                | -1.19989      |
| KLRB1                | 8.251271                  | 0.000176       | 0.032513                | -1.16656      |
| ATP5F1E              | 11.22985                  | 6.48E-07       | 0.000621                | -1.15667      |
| ENY2                 | 10.31544                  | 1.00E-06       | 0.000869                | -1.21679      |

|                    |          |          |          |          |
|--------------------|----------|----------|----------|----------|
| SUV39H1            | 6.920705 | 3.37E-07 | 0.000368 | -1.08737 |
| SLIRP              | 7.58295  | 0.000831 | 0.09017  | -1.05784 |
| TMA7               | 10.84398 | 0.000131 | 0.026946 | -1.1557  |
| MRPL51             | 8.579389 | 1.73E-10 | 8.62E-07 | -1.21598 |
| POLR3GL            | 9.546271 | 1.62E-07 | 0.00021  | -1.12614 |
| SARNP              | 7.817862 | 1.37E-05 | 0.005754 | -1.16995 |
| PET100             | 10.90771 | 0.000112 | 0.024617 | -1.20543 |
| GIMAP7             | 10.4828  | 8.81E-07 | 0.000789 | -1.14331 |
| BEX5               | 6.415435 | 0.000231 | 0.037585 | -1.20644 |
| CMTM2              | 10.03815 | 7.27E-05 | 0.017908 | -1.023   |
| <b>Upregulated</b> |          |          |          |          |
| CYP1B1             | 7.127202 | 0.000229 | 0.037585 | 1.10756  |
| VCAN               | 7.147938 | 5.82E-05 | 0.015901 | 1.179384 |
| CPT1B              | 8.152227 | 1.64E-07 | 0.00021  | 1.037231 |
| CSTF2T             | 5.449478 | 0.000109 | 0.024292 | 1.029825 |
| YOD1               | 6.412912 | 2.63E-06 | 0.001842 | 1.745776 |
| CLEC1A             | 3.087444 | 0.000125 | 0.026462 | 1.019138 |
| ERGIC1             | 9.151039 | 3.36E-05 | 0.010677 | 1.333477 |
| CD36               | 7.194779 | 0.000337 | 0.049781 | 1.132183 |
